# Supplementary material
Source: PubMed Central journal article supplement (PMC4863565)
Supplement: mmc1.pdf [file mmc1.pdf]

**Supplemental Data**

**Mutations in *DNMT3B* Modify**

**Epigenetic Repression of the D4Z4 Repeat**

**and the Penetrance of Facioscapulohumeral Dystrophy**

**Marlinde L. van den Boogaard, Richard J.L.F. Lemmers, Judit Balog, Mariëlle Wohlgemuth, Mari Auranen, Satomi Mitsuhashi, Patrick J. van der Vliet, Kirsten R. Straasheijm, Rob F.P. van den Akker, Marjolein Kriek, Marlies E.Y. Laurensse-Bik, Vered Raz, Monique M. van Ostaijen-ten Dam, Kerstin B.M. Hansson, Elly L. van der Kooi, Sari Kiuru-Enari, Bjarne Udd, Maarten J.D. van Tol, Ichizo Nishino, Rabi Tawil, Stephen J. Tapscott, Baziel G.M. van Engelen, and Silvére M. van der Maarel**

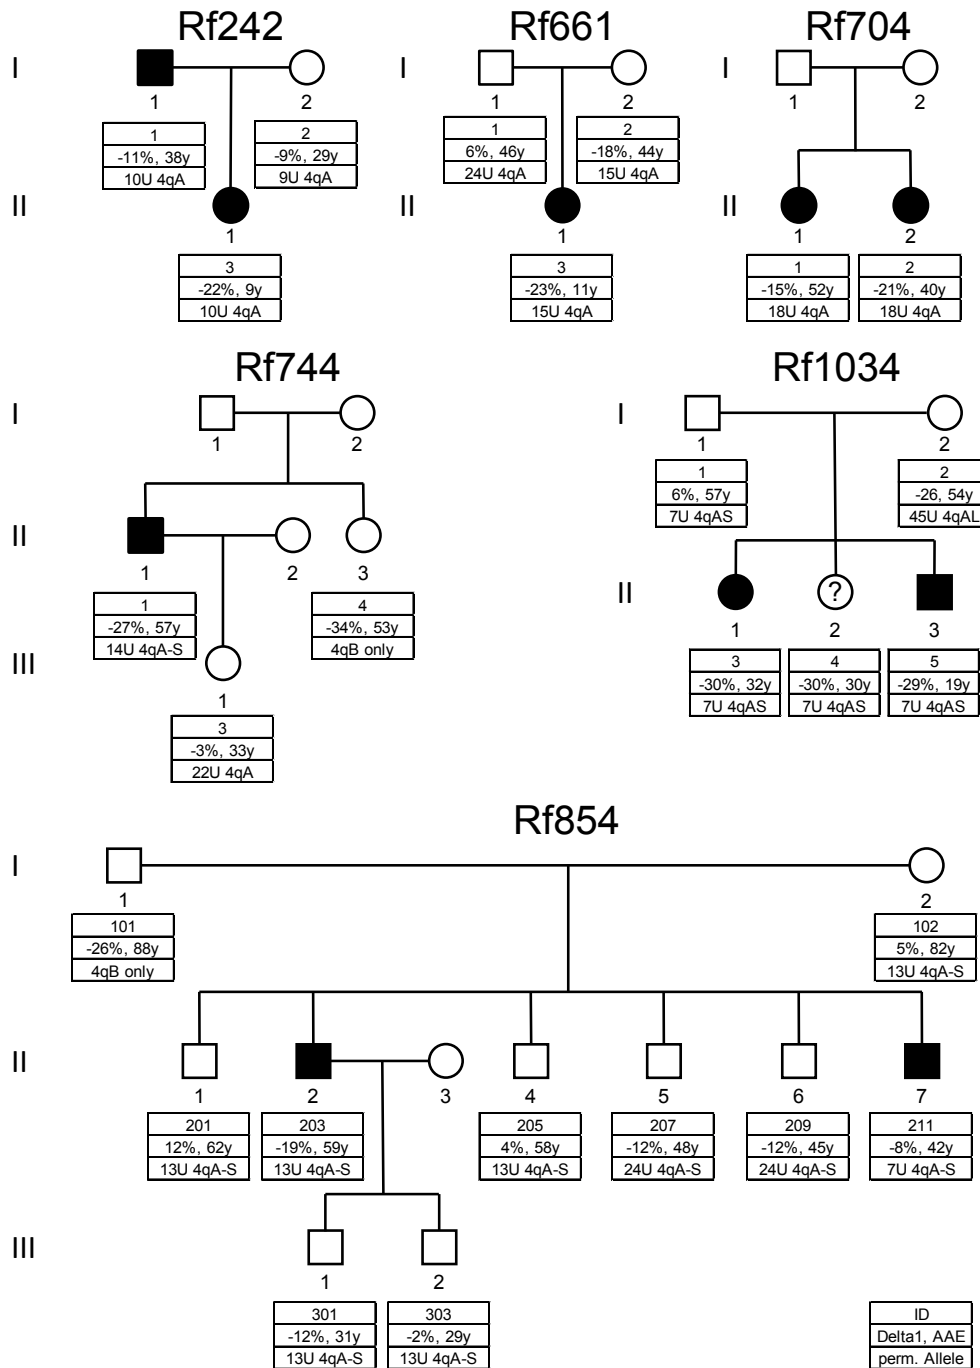

**Figure O1. FSHD2 families without *SMCHD1* mutation**

Families with evidence for hereditary D4Z4 hypomethylation that were tested negative for exonic *SMCHD1* and *DNMT3B* mutations. In all families, the Delta1 score was moderately to strongly reduced with possibility of dominant or recessive inheritance of D4Z4 hypomethylation. Family Rf854 was presented previously as FSHD1 (Rf854.211) and *SMCHD1* mutation negative FSHD2 family.<sup>1</sup> Key: ID = identifier, Delta1 score, AAE = age at examination, number of repeat units (U) on smallest permissive allele.

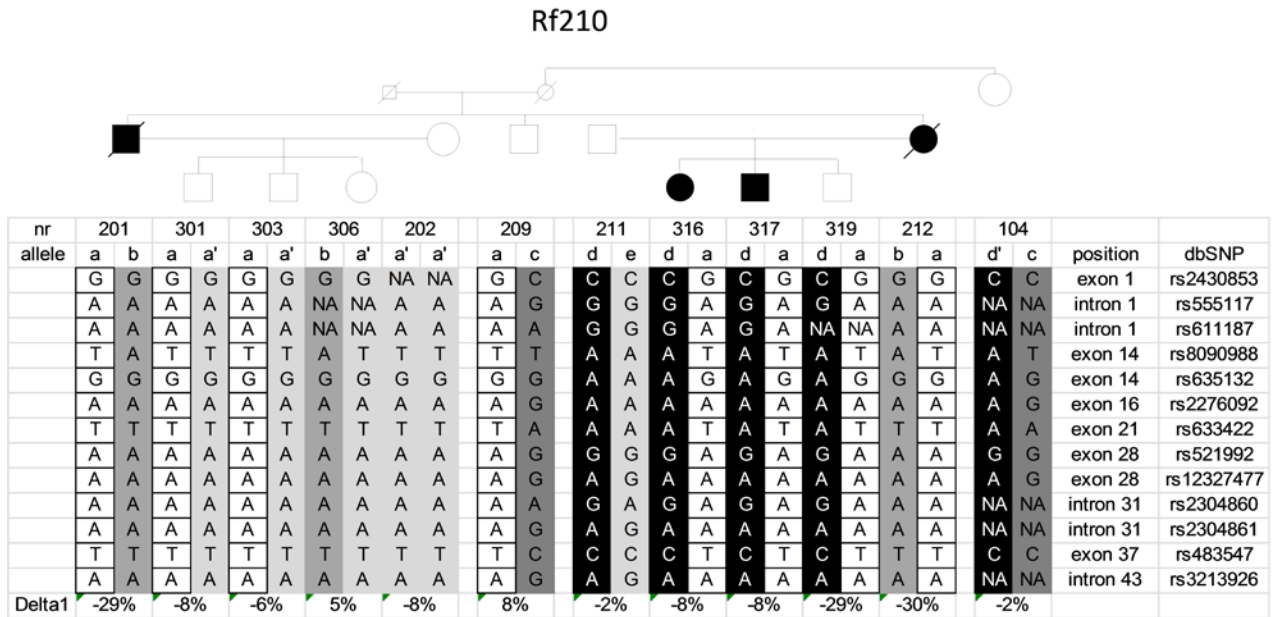

**Figure S2. Exclusion of *SMCHD1* in Rf210**

Haplotype analysis in family Rf210 based on common SNPs defined different alleles. Segregation analysis showed that the common *SMCHD1* allele (allele a) found in individuals with D4Z4 hypomethylation (201, 212 and 319; Delta1 values -29% and -30%) was also found in individuals with normal methylation (301, 303, 209, 316 and 317). The position of the SNPs (NA means not analyzed) and dbSNP identifier are shown on the right. Delta1 methylation values are shown below.

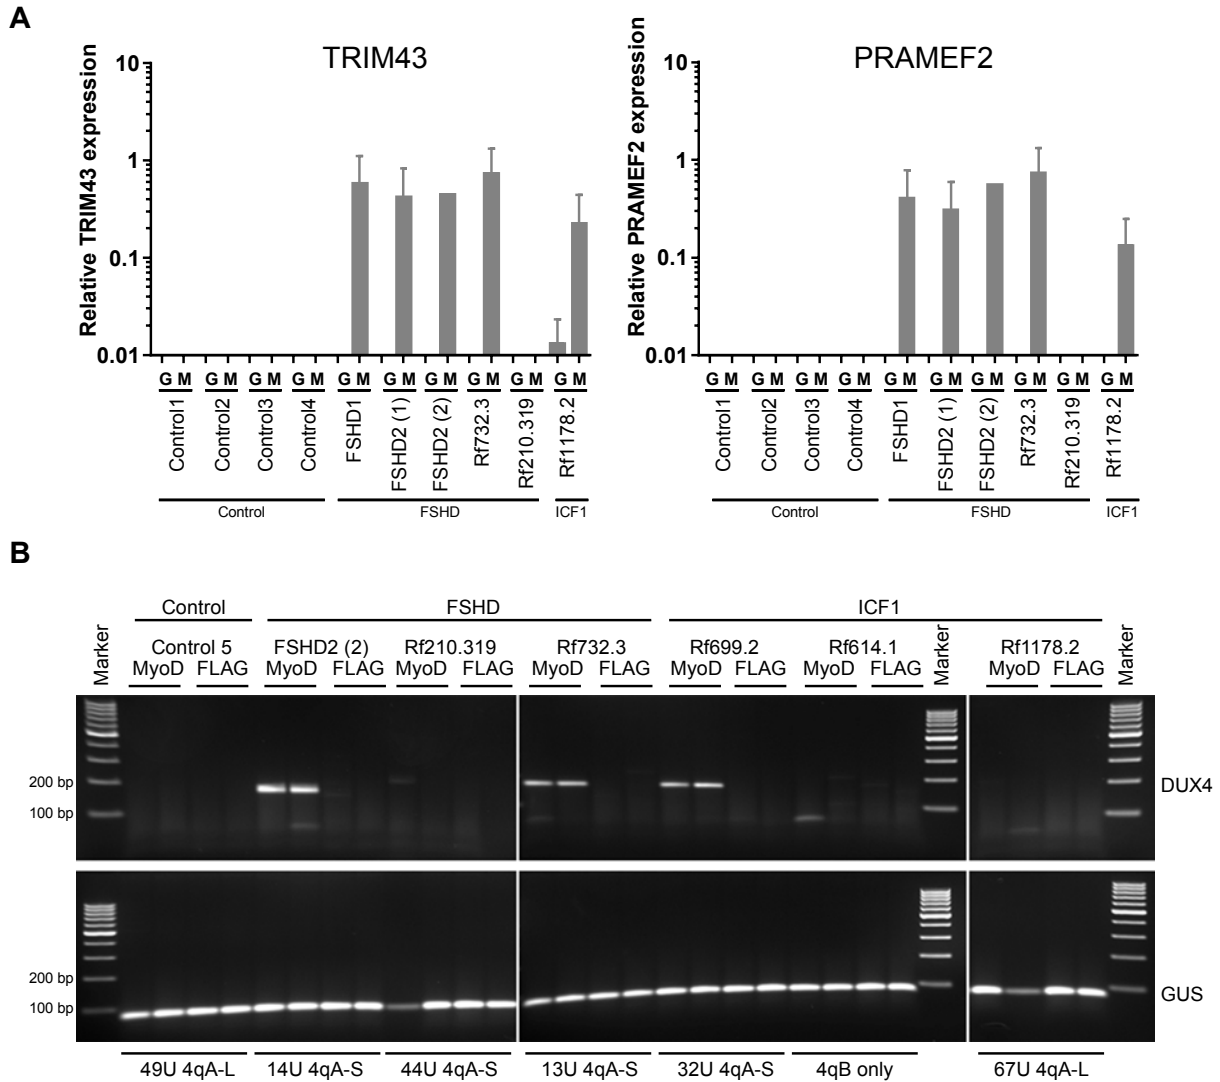

**Figure S3. DUX4 target gene expression and DUX4 expression in FSHD and ICF1**

(A) Expression of DUX4 target genes *TRIM43* and *PRAMEF2* by Q-PCR in GFP- (G) or MyoD- (M) transduced fibroblasts from controls, FSHD1, FSHD2, Rf210.319, Rf732.3 and ICF1 (Rf1178.2). All transductions were performed twice for each cell line, except for control 4 (1x transduced with GFP, 2x transduced with MyoD) and FSHD2 (2) (transduced 1x with GFP and 1x with MyoD). Mean expression values with standard deviations are shown relative to the reference genes *GUSB* and *RPL27*. (B) Gel of Q-PCR for DUX4 and GUS in Flag and MyoD transduced fibroblasts from control, FSHD2, Rf210.319, Rf732.3 and ICF1 (Rf699.2, Rf614.1, Rf1178.2). Technical duplicates are shown. The smallest D4Z4 repeat array on a FSHD permissive allele (4qA) in each individual is indicated below the gel. A PCR product for DUX4 is only detected in MyoD transduced fibroblasts from FSHD2, Rf732.3 and Rf699.2. The DUX4 RT-PCR is performed with primers for the most common DUX4-4A-S variant, but the primers do not recognize DUX4-4A-L. The fibroblast from Rf1178.2 carries a 4qA-L allele.

A

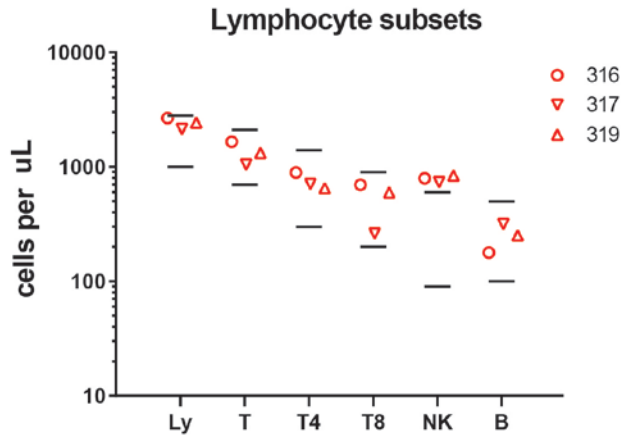

B

| ID               | IgG (g/L) | IgA (g/L) | IgM (g/L) |
|------------------|-----------|-----------|-----------|
| 316              | 12.2      | 2.81      | 0.99      |
| 317              | 9.38      | 1.92      | 0.74      |
| 319              | 10.5      | 2.29      | 0.56      |
| reference values | 7-16      | 0.7-4     | 0.42-2.3  |

**Figure S4. Immunological analysis**

(A) The numbers of lymphocytes (Ly), T-cells (T), CD4+ and CD8+ T-cell subsets (T4 and T8), NK cells (NK) and B-cells (B) in blood for siblings from family Rf210. The range of the normal values is depicted and represents the 5th and 95th percentiles. (B) Serum levels of IgG, IgA and IgM for siblings from family Rf210 and the reference values.

| Nr        | gender | Chromosome position | Transcript position | AAE | ACSS | delta1 | 4q allele 1 |        | 4q allele 2 |        |
|-----------|--------|---------------------|---------------------|-----|------|--------|-------------|--------|-------------|--------|
|           |        | Chr20(GRCh37)       | NM_006892.3         |     |      |        | units       | A/B    | units       | A/B    |
| Rf210.101 | M      | NA                  | NA                  | NA  | NA   | NA     | 20          | 4A161L | 29          | 4B168  |
| Rf210.201 | M      | g.[31386354T>C];[=] | c.[1579T>C];[=]     | 63  | 111  | -29    | 9           | 4A161S | 20          | 4A161L |
| Rf210.301 | M      | WT                  | WT                  | 38  | 0    | -8     | 20          | 4A161L | 71          | 4B168  |
| Rf210.303 | M      | WT                  | WT                  | 35  | 0    | -6     | 9           | 4A161S | 33          | 4B163  |
| Rf210.306 | F      | WT                  | WT                  | 33  | 0    | 5      | 20          | 4A161L | 33          | 4B163  |
| Rf210.202 | F      | WT                  | WT                  | 60  | 0    | -8     | 33          | 4B163  | 71          | 4B168  |
| Rf210.209 | M      | WT                  | WT                  | 55  | 0    | 8      | 17          | 4B163  | 29          | 4B168  |
| Rf210.211 | M      | WT                  | WT                  | 56  | 0    | -2     | 23          | 4B168  | 44          | 4A161S |
| Rf210.316 | F      | WT                  | WT                  | 30  | 67   | -8     | 9           | 4A161S | 44          | 4A161S |
| Rf210.317 | M      | WT                  | WT                  | 40  | 50   | -8     | 9           | 4A161S | 23          | 4B168  |
| Rf210.319 | M      | g.[31386354T>C];[=] | c.[1579T>C];[=]     | 37  | 0    | -29    | 29          | 4B168  | 44          | 4A161S |
| Rf210.212 | F      | g.[31386354T>C];[=] | c.[1579T>C];[=]     | 52  | 135  | -30    | 9           | 4A161S | 29          | 4B168  |
| Rf210.102 | F      | NA                  | NA                  | NA  | NA   | NA     | 9           | 4A161S | 17          | 4B163  |
| Rf210.104 | F      | WT                  | WT                  | 70  | 0    | -2     | 9           | 4A161S | 15          | 4B163  |
| Rf732.1   | M      | g.[31389159C>T];[=] | c.[2072C>T];[=]     | 74  | 0    | -22    | 13          | 4A161S | 24          | 4B168  |
| Rf732.3   | M      | g.[31389159C>T];[=] | c.[2072C>T];[=]     | 45  | 89   | -22    | 13          | 4A161S | 15          | 4B163  |
| Rf732.5   | M      | WT                  | WT                  | 38  | 0    | -10    | 13          | 4A161S | 25          | 4B168  |
| Rf732.2   | F      | WT                  | WT                  | 68  | 0    | 1      | 15          | 4B163  | 25          | 4B168  |

**Table S1. Detailed genotype and phenotype FSHD families**

Table summarizing the clinical, D4Z4 methylation and genetic data from FSHD families Rf210 and Rf732. Column 1 shows the individual number, column 2 the gender (F= female, M = male), column 3 and 4 show the mutation in DNMT3B at the chromosome and transcript position, respectively, column 5 shows the age at examination (AAE), column 6 shows the age corrected clinical severity score (ACSS)<sup>2,3</sup>, column 7 shows the Delta1 value for D4Z4 methylation at the *FseI* site, column 8-11 show the D4Z4 array sizes, and haplotype (including S or L for 4qA-S or 4qA-L) of the 4q alleles. NA means not analyzed.

A

| nr        | gender | ACSS | Delta1 | 4q allele 1 |        | 4q allele 2 |        | Pedigree      |
|-----------|--------|------|--------|-------------|--------|-------------|--------|---------------|
|           |        |      |        | units       | A/B    | units       | A/B    |               |
| Rf201.309 | M      | 143  | -21    | 7           | 4A161S | 27          | 4B163  |               |
| Rf242.3   | M      | NA   | -22    | 10          | 4A161  | 105H2       | 4A157  | see figure S2 |
| Rf537.1   | M      | NA   | -18    | 7           | 4A161S | 37          | 4B163  |               |
| Rf584.2   | F      | 19   | -18    | 9           | 4A161S | 32          | 4B168  |               |
| Rf661.2   | F      | NA   | -18    | 15          | 4A161  | 20          | 4A161  | see figure S2 |
| Rf704.2   | F      | 150  | -21    | 18          | 4A161  | 48          | 4A161  | see figure S2 |
| Rf744.1   | M      | 88   | -27    | 14          | 4A161S | 29          | 4B163  | see figure S2 |
| Rf838.1   | F      | 100  | -32    | 11          | 4A161L | 58          | 4A161L |               |
| Rf854.203 | F      | 34   | -19    | 13          | 4A161S | 15          | 4B163  | see figure S2 |
| Rf901.1   | F      | 49   | -17    | 18          | 4B168  | 37          | 4A161S |               |
| Rf946.2   | M      | 63   | -22    | 8           | 4A161S | 27H1        | 4A166  |               |
| Rf982.1   | M      | 127  | -18    | 7           | 4A161S | 20          | 4B163  |               |
| Rf1010.1  | F      | NA   | -21    | 12          | 4A161S | 51          | 4B163  |               |
| Rf1034.5  | M      | 158  | -29    | 7           | 4A161S | 45          | 4A161L | see figure S2 |
| Rf1049.1  | F      | 54   | -22    | 6           | 4A161S | 37          | 4A161S |               |
| Rf1093.1  | F      | NA   | -17    | 11          | 4A161  | 13          | 4A161  |               |
| Rf1154.2  | F      | NA   | -32    | 37          | 4A161  | 43          | 4B163  |               |
| Rf1239.1  | M      | 140  | -19    | 8           | 4A161  | 36          | 4A161  |               |
| Rf1449a.1 | F      | 196  | -27    | 7           | 4A161  | 36          | 4B168  |               |
| Rf1464.1  | M      | 94   | -19    | 14          | 4A161S | 12          | 4B163  |               |

B

| nr | gender | ACSS | DR1 methylation | 4qA allele |
|----|--------|------|-----------------|------------|
| 1  | M      | NA   | 23              | >10        |
| 2  | F      | 128  | 21              | 11A        |
| 3  | F      | 159  | 24              | 8A         |
| 4  | F      | 189  | 21              | 7A         |
| 5  | F      | 97   | 17              | 8A         |
| 6  | M      | 135  | 13              | 13A        |

**Table S2. Overview of individuals screened for exonic *DNMT3B* mutations**

(A) Table summarizing the clinical, D4Z4 methylation and genetic data from 20 FSHD cases screened for exonic mutations in *DNMT3B* at the LUMC, Leiden, the Netherlands. Column 2 shows gender (F= female, M = male), column 3 shows the age corrected clinical severity score (ACSS), column 4 shows the Delta1 score for D4Z4 methylation at the FseI site, column 5-8 show the sizes, SLP size and haplotype (including S or L for 4qA-S or 4qA-L when available) of the 4q alleles. NA means not analyzed. (B) Table summarizing the clinical, D4Z4 methylation and genetic data from 6 cases screened for exonic mutations in *DNMT3B* at the NCNP, Tokyo, Japan. Column 4 shows the DR1 methylation percentage, column 5 shows the size of the shortest 4qA allele, size information of the other 4q allele and SLP sizes are not available.

| Patient identifier | DNMT3B mutations                |                |                              |                         | Hansen et al. 1999 (ref 4) | Hagleitner et al. 2008 (ref 5) | Weemaes et al, 2013 (ref 6) |
|--------------------|---------------------------------|----------------|------------------------------|-------------------------|----------------------------|--------------------------------|-----------------------------|
|                    | Transcript position NM_006892.3 |                | Protein position NP_008823.1 |                         |                            |                                |                             |
|                    | Allele 1                        | Allele 2       | Allele 1                     | Allele 2                |                            |                                |                             |
| Rf285.1            | c.2421-11G>A                    | c.2421-11G>A   | p.E806_R807insSerThrPro      | p.E806_R807insSerThrPro | -                          | Patient 33                     | Patient 33                  |
| Rf285.2            | c.2421-11G>A                    | c.2421-11G>A   | p.E806_R807insSerThrPro      | p.E806_R807insSerThrPro | Family 2                   | Patient 29                     | Patient 29                  |
| Rf286.2            | c.2177T>G                       | c.2177T>G      | Val726Gly                    | Val726Gly               | Family 1                   | Patient 16                     | Patient 16                  |
| Rf614.1            | c.2292G>T                       | c.2342_2343del | Arg764Ser                    | Ile781Lysfs*23          | -                          | Patient 45                     | Patient 45                  |
| Rf699.2            | c.1918G>C                       | c.1918G>C      | Gly640Arg                    | Gly640Arg               | -                          | -                              | Patient 50                  |
| Rf1178.2           | c.1807G>A                       | c.2421-11G>A   | Ala603Thr                    | p.E806_R807insSerThrPro | Family 3                   | Patient 7                      | Patient 7                   |

**Table S3. Overview of ICF1 patients included in this study**

Column 1 shows the patient identifier in this study. Columns 2-5 show the positions of the DNMT3B mutations on the transcript and protein level. Columns 6-8 show the identifiers from the patients in previous studies.



|                |                         |
|----------------|-------------------------|
| DNMT3Bex2F     | GGCAAGAGCATCACCCCTAAG   |
| DNMT3Bex2R     | TTGTGGTGGAGGTTGTTCAGAGA |
| DNMT3Bex3F     | GACGGACTGAGAGCAAATCC    |
| DNMT3Bex3R     | CGTGATGAAAGCCAAAGACA    |
| DNMT3Bex4F     | GTGTGTTGTGATGAGTGACCCG  |
| DNMT3Bex4R     | GCTCCCCTAAGGAGCTATGC    |
| DNMT3Bex5F     | CAGGCCTCCAGTCACCTAAG    |
| DNMT3Bex5R     | AGCCACAACCAGTAGTGCAG    |
| DNMT3Bex6F     | TTCTTTTTGCCTAGGAGCCA    |
| DNMT3Bex6R     | GGTAACTGGTTTTTCCCCGT    |
| DNMT3Bex7F     | GCCTCTCCTCACTGGGATTT    |
| DNMT3Bex7R     | TTTGTCTTCAAAGGGAGGCA    |
| DNMT3Bex8F     | CACCTGGGACACACCTGTAG    |
| DNMT3Bex8R     | TCTCTTGCTTCATCCCTGC     |
| DNMT3Bex9F     | GGAATGTAGGCCCTGGCT      |
| DNMT3Bex9R     | GTGGCTGACTCTCCCAAGAA    |
| DNMT3Bex10F2   | AGGCTGAGGTGGGAGAATTG    |
| DNMT3Bex10R2   | GCAAAGAAATCAGAAGAAAGTGC |
| DNMT3Bex11-12F | CTGGTACCCAGGCATAGCAT    |
| DNMT3Bex11-12R | AGGACAAGGCAGGCCTAGAG    |
| DNMT3Bex13-14F | ACTGAGAGACCCCAGGCTTT    |
| DNMT3Bex13-14R | GACTGCAGGAACGTAGGAGC    |
| DNMT3Bex15F    | TCCCTGTGGAAGTGGTAAGG    |
| DNMT3Bex15R    | TTCCAGAGCTTTCCAACACC    |
| DNMT3Bex16F    | CAAGGTTTGAAGCCCTCTGA    |
| DNMT3Bex16R    | TAATCCCCAGGGACCTTTCT    |
| DNMT3Bex17F    | GCTGCTGTGTGCTCAGCATCATT |
| DNMT3Bex17R    | GGAGGACTGGGGAAAAAGAC    |
| DNMT3Bex18F    | TGACCTCAGGTAATCCACCC    |
| DNMT3Bex18R    | CCAGTAACTTGGCCAGAAGC    |
| DNMT3Bex19F    | CCTGCTGGTCTCAGGGAATA    |
| DNMT3Bex19R    | GACCAAGAACGGGAAAGTCA    |
| DNMT3Bex20F    | GCCTCATCCATAGTCAGGGA    |
| DNMT3Bex20R    | CAGAGCCAGGTCTTTCT       |
| DNMT3Bex21F    | TGCCAGGATCATTTCATCA     |
| DNMT3Bex21R    | TCACCAAGTGCATTTTTCCA    |
| DNMT3Bex22F2   | CAGCCCTGCCACTCTTCT      |
| DNMT3Bex22R    | TCTGCCCATTTGTGTTTTGA    |
| DNMT3Bex23F    | ACTGATGGGACTGAGGGATG    |
| DNMT3Bex23R    | ATGCCTTCAGGAATCACACC    |

**Table 04. DNMT3B primers used for screen for exonic DNMT3B mutations in this study**

| Target  | Forward                   | Reverse               |
|---------|---------------------------|-----------------------|
| PRAMEF2 | GCAAGTTAAGCCTGGAGACG      | CCCTAGCAGCAAAGATGGAG  |
| LEUTX   | AAGGAGGAGACTCCCTCAGC      | AAAGAGAGTGGAGGCCCAAG  |
| TRIM43  | ACCCATCACTGGACTGGTGT      | CACATCCTCAAAGAGCCTGA  |
| RPL27   | CCCACATCAAGGAACTGGAG      | TGTTGGCATCCAAGGTCATA  |
| DUX4    | TCCAGGAGATGTA ACTCTAATCCA | CCCAGGTACCAGCAGACC    |
| GUSB    | CCGAGTGAAGATCCCCTTTTA     | CTCATTGGGAATTTGCCGATT |
| MYOG    | GCCAGACTATCCCCTTCCTC      | GGGGATGCCCTCTCCTCTAA  |
| MYH3    | GATTGCAGGATCTGGTGGAT      | CCTGCTGGAGGTGAAGTCTC  |

**Table S5. Q-PCR primers used in this study**

**References:**

1. Lemmers, R.J., Tawil, R., Petek, L.M., Balog, J., Block, G.J., Santen, G.W., Amell, A.M., van der Vliet, P.J., Almomani, R., Straasheijm, K.R., et al. (2012). Digenic inheritance of an SMCHD1 mutation and an FSHD-permissive D4Z4 allele causes facioscapulohumeral muscular dystrophy type 2. *Nat. Genet.* 44, 1370-1374.
2. Ricci, E., Galluzzi, G., Deidda, G., Cacurri, S., Colantoni, L., Merico, B., Piazzo, N., Servidei, S., Vigneti, E., Pasceri, V. (1999). Progress in the molecular diagnosis of facioscapulohumeral dystrophy and correlation between the number of KpnI repeat at the 4q35 locus and clinical phenotype. *Ann. Neurol.* 45, 751-757.
3. van Overveld, P.G., Enthoven, L., Ricci, E., Rossi, M., Felicetti, L., Jeanpierre, M., Winokur, S.T., Frants, R.R., Padberg, G.W., and van der Maarel, S.M. (2005). Variable hypomethylation of D4Z4 in facioscapulohumeral muscular dystrophy. *Ann. Neurol.* 58, 569-576.
4. Hansen, R.S., Wijmenga, C., Luo, P., Stanek, A.M., Canfield, T.K., Weemaes, C.M., and Gartler, S.M. (1999). The DNMT3B DNA methyltransferase gene is mutated in the ICF immunodeficiency syndrome. *Proc. Natl. Acad. Sci. USA* 96, 14412-14417.
5. Hagleitner, M.M., Lankester, A., Maraschio, P., Hulten, M., Fryns, J.P., Schuetz, C., Gimelli, G., Davies, E.G., Gennery, A., Belohradsky, B.H., et al. (2008). Clinical spectrum of immunodeficiency, centromeric instability and facial dysmorphism (ICF syndrome). *J. Med. Genet.* 45, 93-99.
6. Weemaes, C.M., van Tol, M.J., Wang, J., van Ostaijen-ten Dam, M.M., van Eggermond, M.C., Thijssen, P.E., Aytakin, C., Brunetti-Pierri, N., van der Burg, M., Graham Davies, E., et al. (2013). Heterogeneous clinical presentation in ICF syndrome: correlation with underlying gene defects. *Eur. J. Hum. Genet.* 21, 1219-1225.
